# Supplementary material for: Iron Oxide Nanoparticles Stimulates Extra-Cellular Matrix Production in Cellular Spheroids
Source: Bioengineering (Basel). 2017 Jan 21;4(1):4. doi: 10.3390/bioengineering4010004 (PMC5590449; doi:10.3390/bioengineering4010004)
Supplement: Supplementary file 1 [file bioengineering-04-00004-s001.pdf]

# Supplementary Materials: Iron Oxide Nanoparticles Stimulates Extra-Cellular Matrix Production in Cellular Spheroids

Megan Casco, Timothy Olsen, Austin Herbst, Grace Evans, Taylor Rothermel, Lauren Pruett, Dan Simionescu, Richard Visconti and Frank Alexis

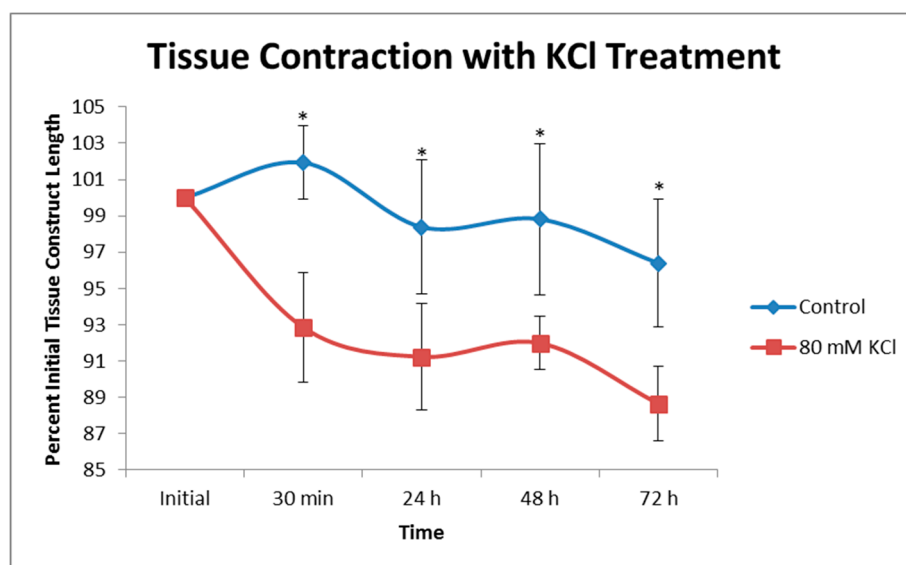

**Figure S1.** Potassium Chloride Assay on “mini” tissues. 25 spheroids with 0.3 mg/mL iron oxide (IO) were fabricated and fused into mini tissue constructs. Results of the KCl functional assay indicate that there is a statistical difference, represented by “\*”, in size over time of the tissues in comparison to the controls.

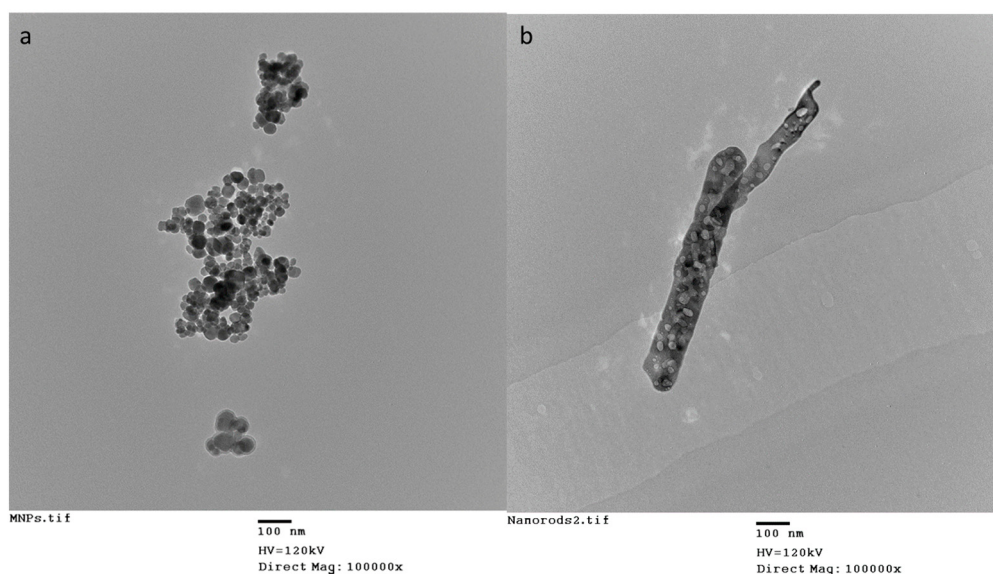

**Figure S2.** TEM of (a) spherical nanoparticles and (b) nanorods at 100,000× magnification.

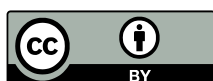

© 2017 by the authors; licensee MDPI, Basel, Switzerland. This article is an open access article distributed under the terms and conditions of the Creative Commons Attribution (CC BY) license (<http://creativecommons.org/licenses/by/4.0/>).
